# Supplementary material for: Neuroprotective Effects of Phytochemicals against Aluminum Chloride-Induced Alzheimer’s Disease through ApoE4/LRP1, Wnt3/β-Catenin/GSK3β, and TLR4/NLRP3 Pathways with Physical and Mental Activities in a Rat Model
Source: MDPI journal article supplement (doi:10.3390/ph15081008), 2022-08-17
Supplement: s1 [file s1]

Supplementary materials:

1) Figures

**Figure S1.** 2D docking poses of compounds (A) MOR (B) TML (C) TMQ (D) galantamine in-to the galantamine binding site in choline esterase PDB: 1DX6.

Supplementary data S1

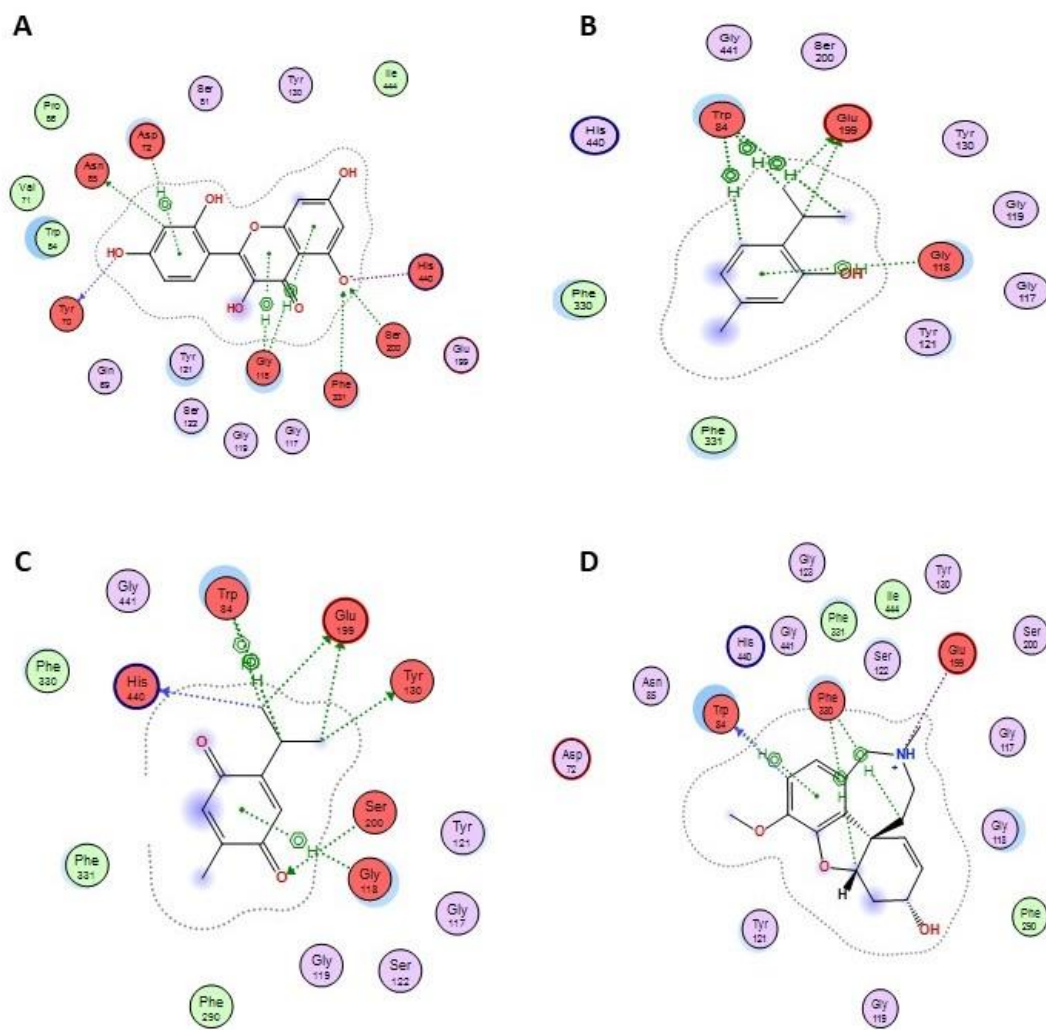



**Figure S3.** 2D docking poses of compounds (A) MOR (B) TML (C) TMQ (D) ligand 66F into the 66F binding site in BACE 1: 7D2V.

Supplementary data S3

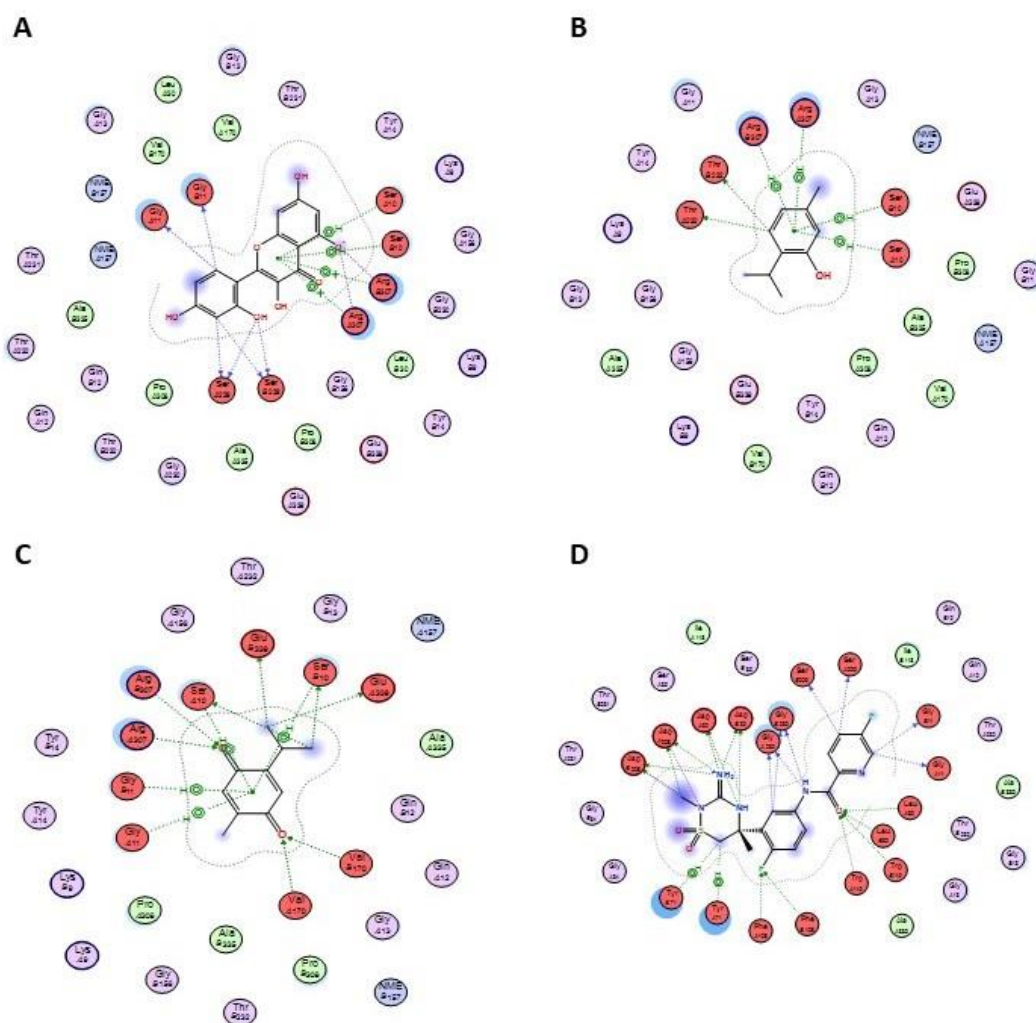

**Figure S4.** 2D docking of compounds (A) MOR (B) TML (C) TMQ (D) the ligand 65A into the 65A binding site in the glycogen synthase kinase 3 PDB: 5HLP.

Supplementary data S4

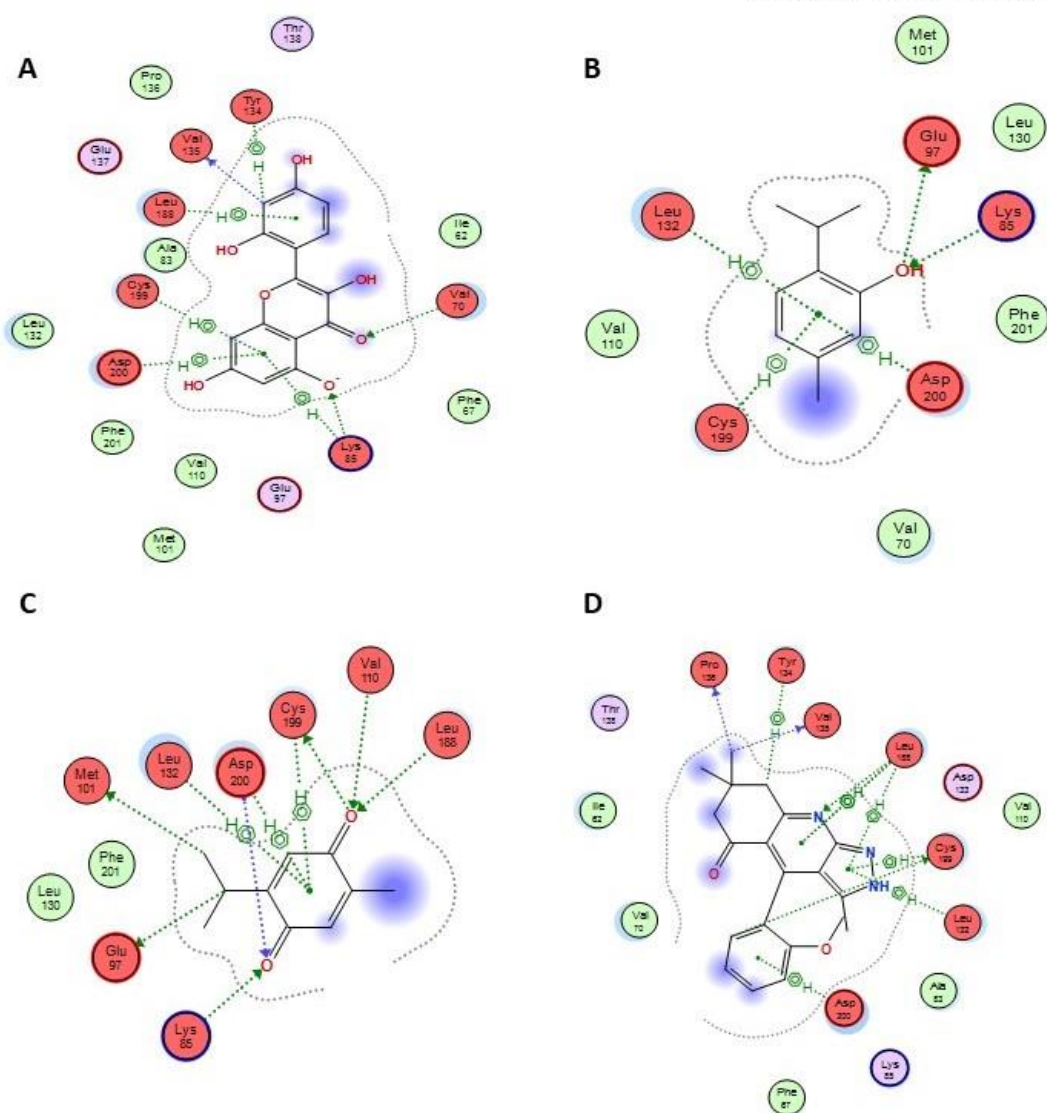

**Figure S5.** 2D docking of compounds (A) MOR (B) TML (C) TMQ (D) the ligand D8N into the D8N binding site in Keap1/5 complex (PDB ID 6FFM).

Supplementary data S5

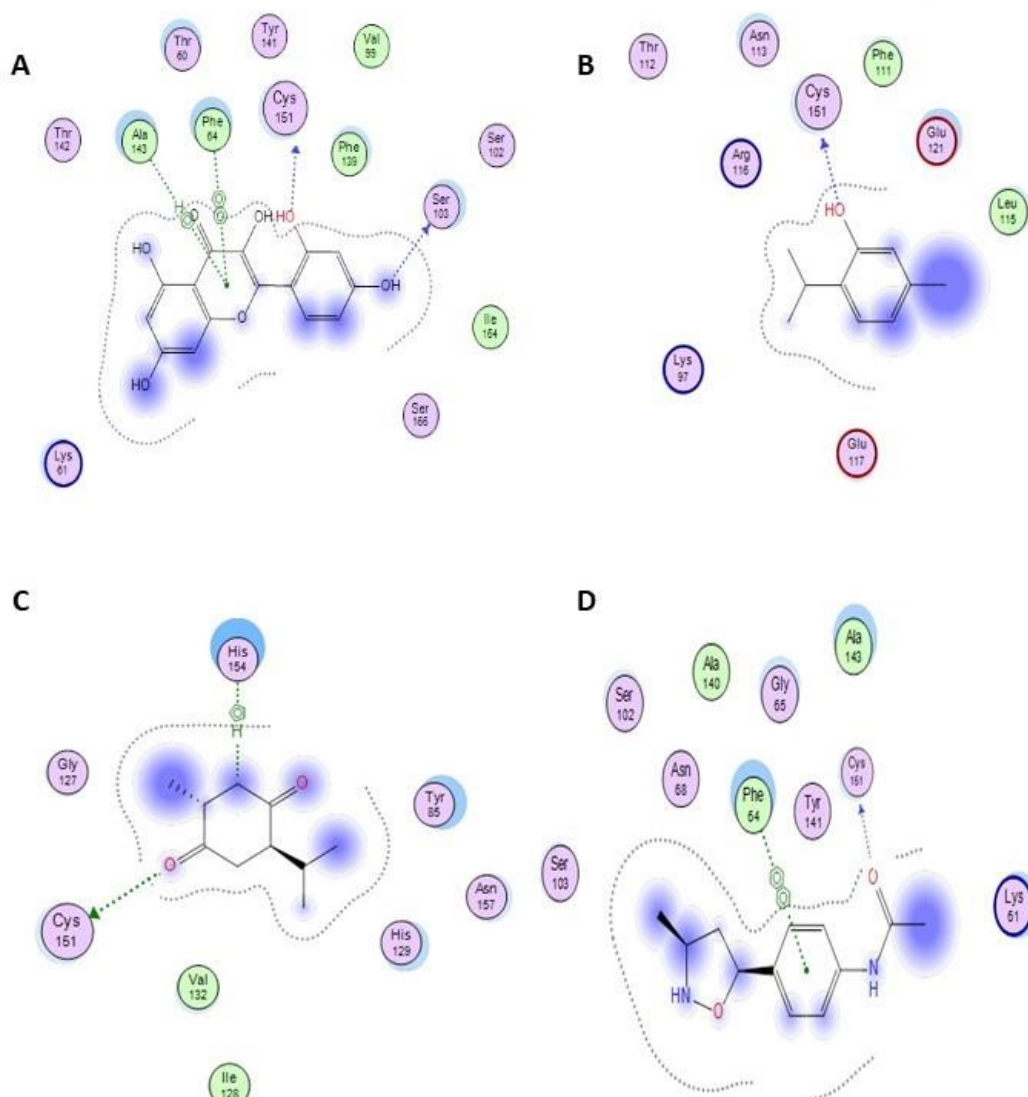



**Figure S6.** 3D docking poses of compounds (A) MOR (B) TML (C) TMQ (D) galantamine into the galantamine binding site in choline esterase PDB: 1DX6.

Supplementary data S6

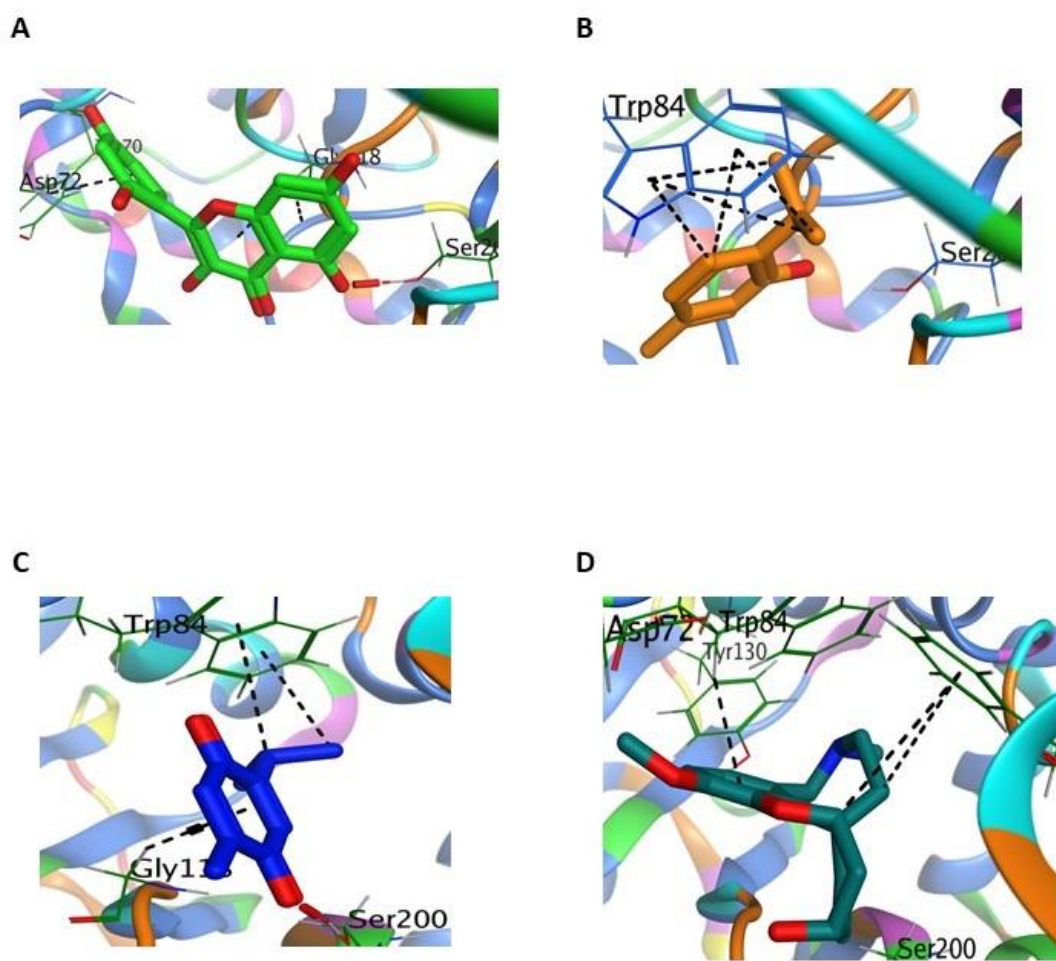

**Figure S7.** 3D docking poses of compounds (A) MOR (B) TML (C) TMQ (D) the ligand 3O0 into the 3O0 binding site in CDK5 PDB: 3O0G.

Supplementary data S7

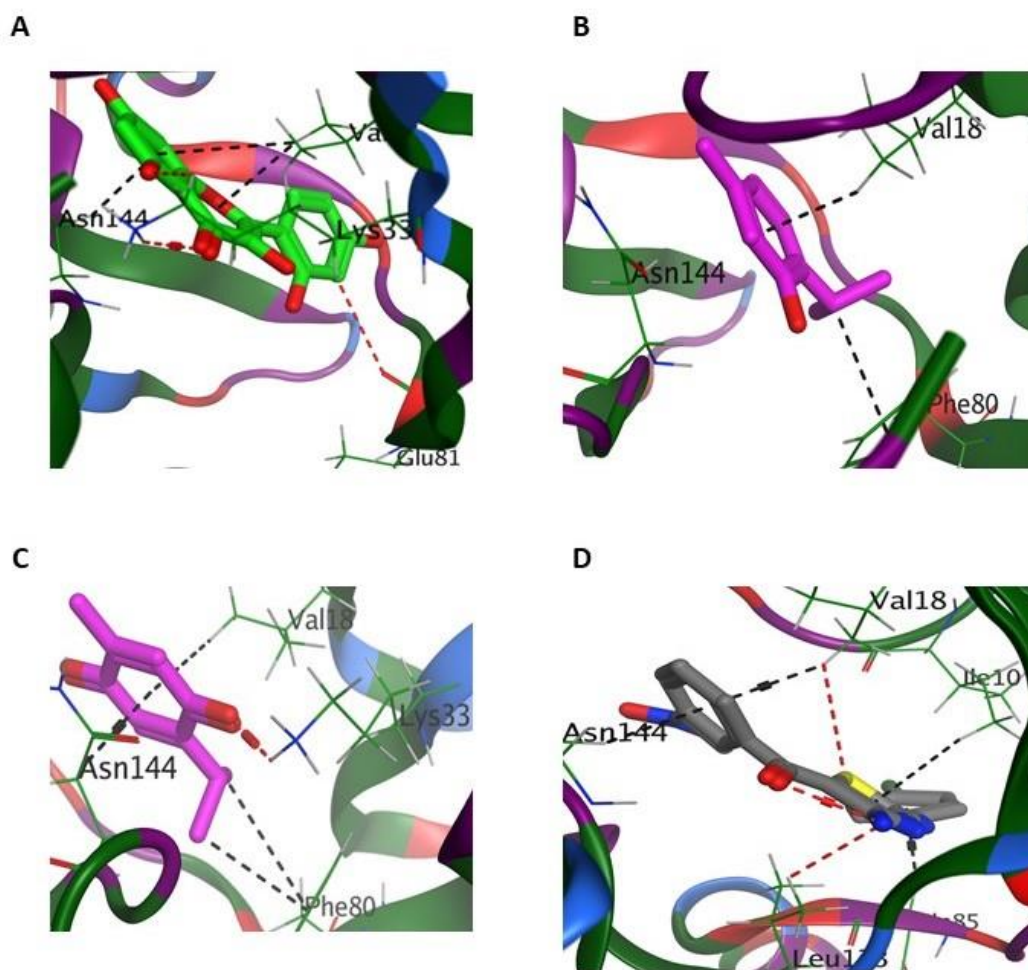

**Figure S8.** 3D docking poses of compounds (A) MOR (B) TML (C) TMQ (D) ligand 66F into the 66F binding site in BACE 1: 7D2V.

Supplementary data S8

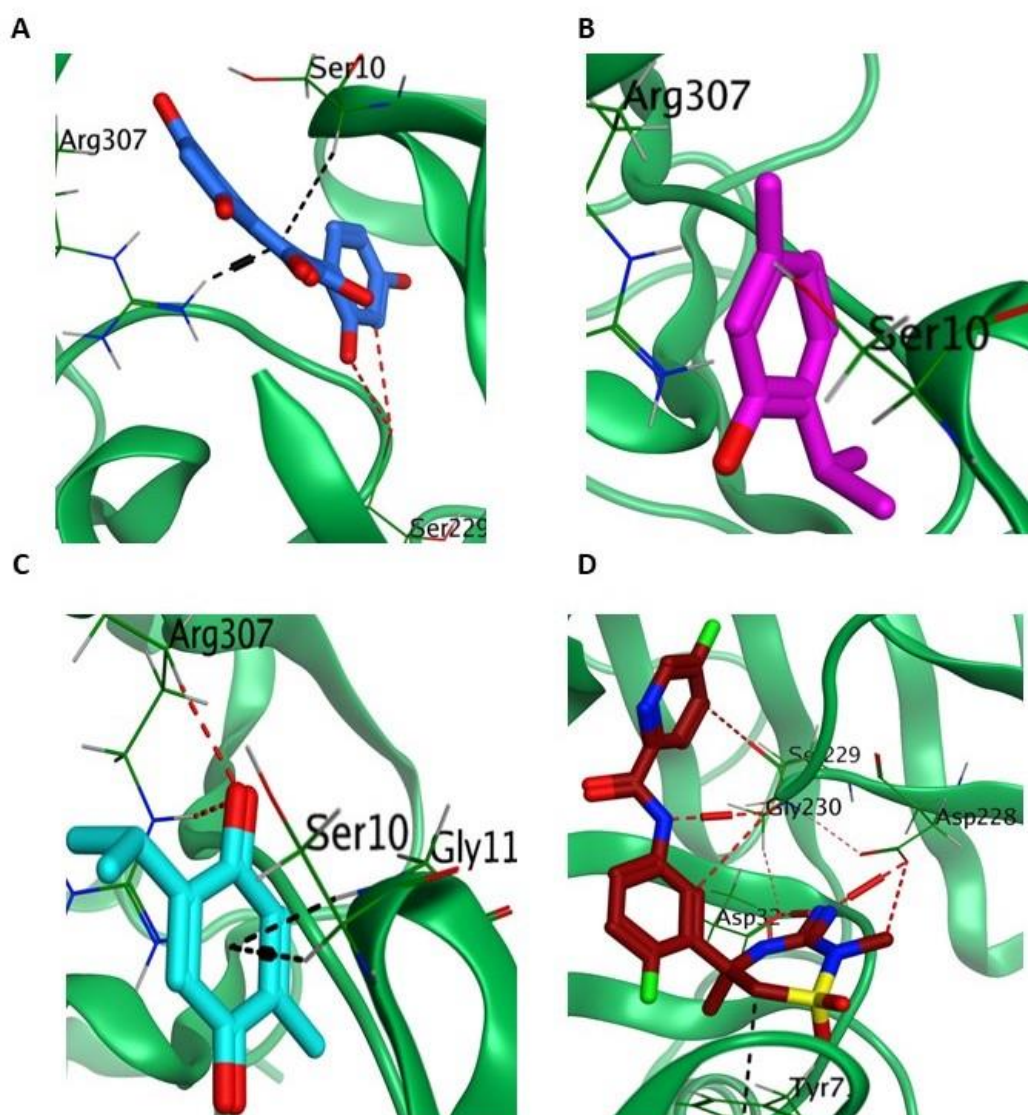



**Figure S9.** 3D docking of compounds (A) MOR (B) TML (C) TMQ (D) the ligand 65A into the 65A binding site in the glycogen synthase kinase 3 PDB: 5HLP.

Supplementary data S9

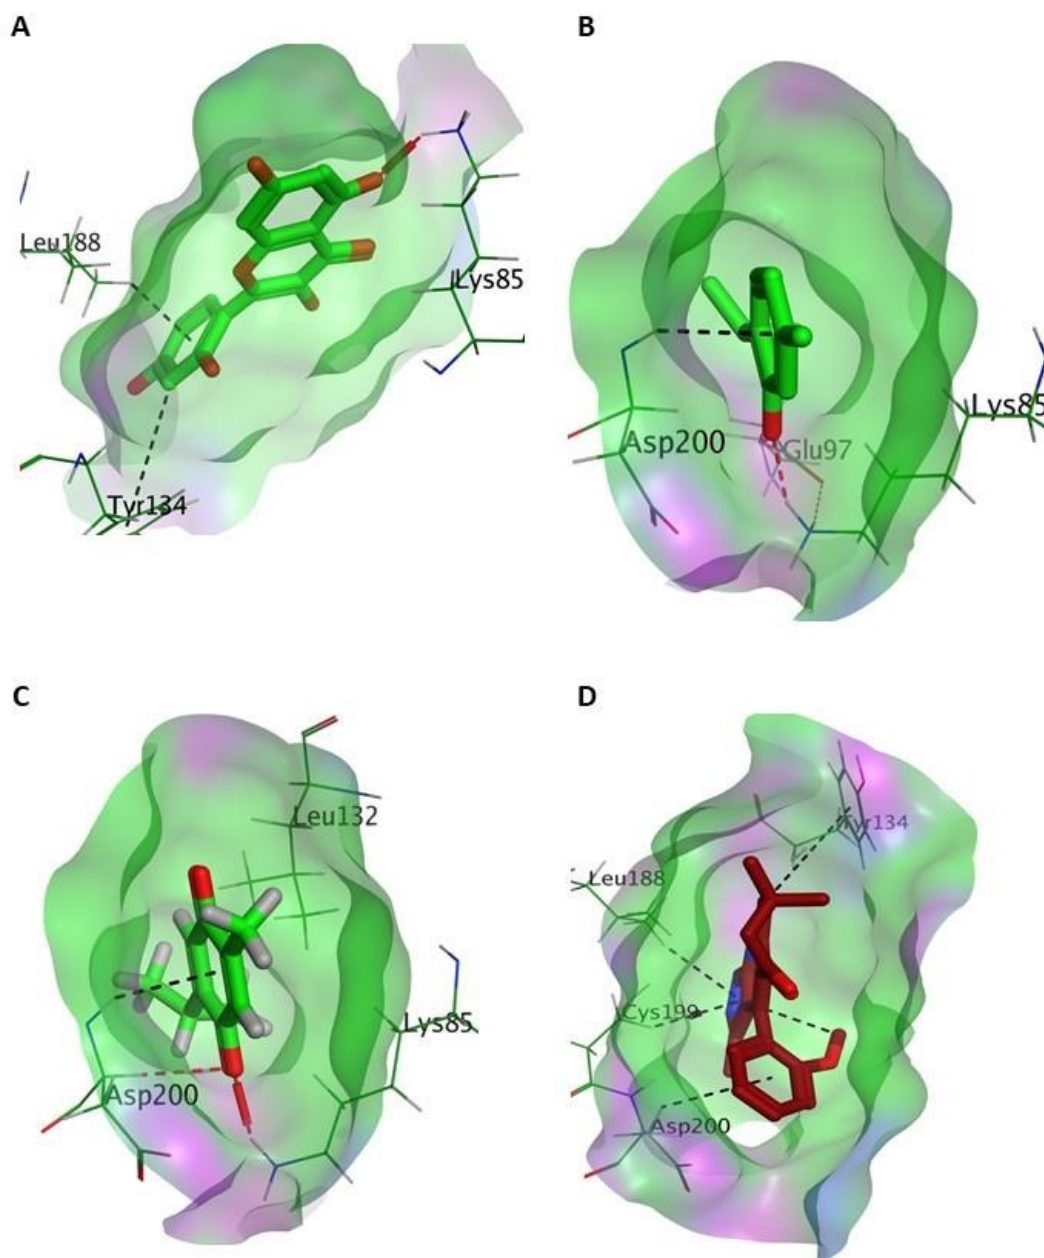

**Figure S10.** 3D docking of compounds (A) MOR (B) TML (C) TMQ (D) the ligand D8N into the D8N binding site in Keap1/5 complex (PDB ID 6FFM).

Supplementary data S10

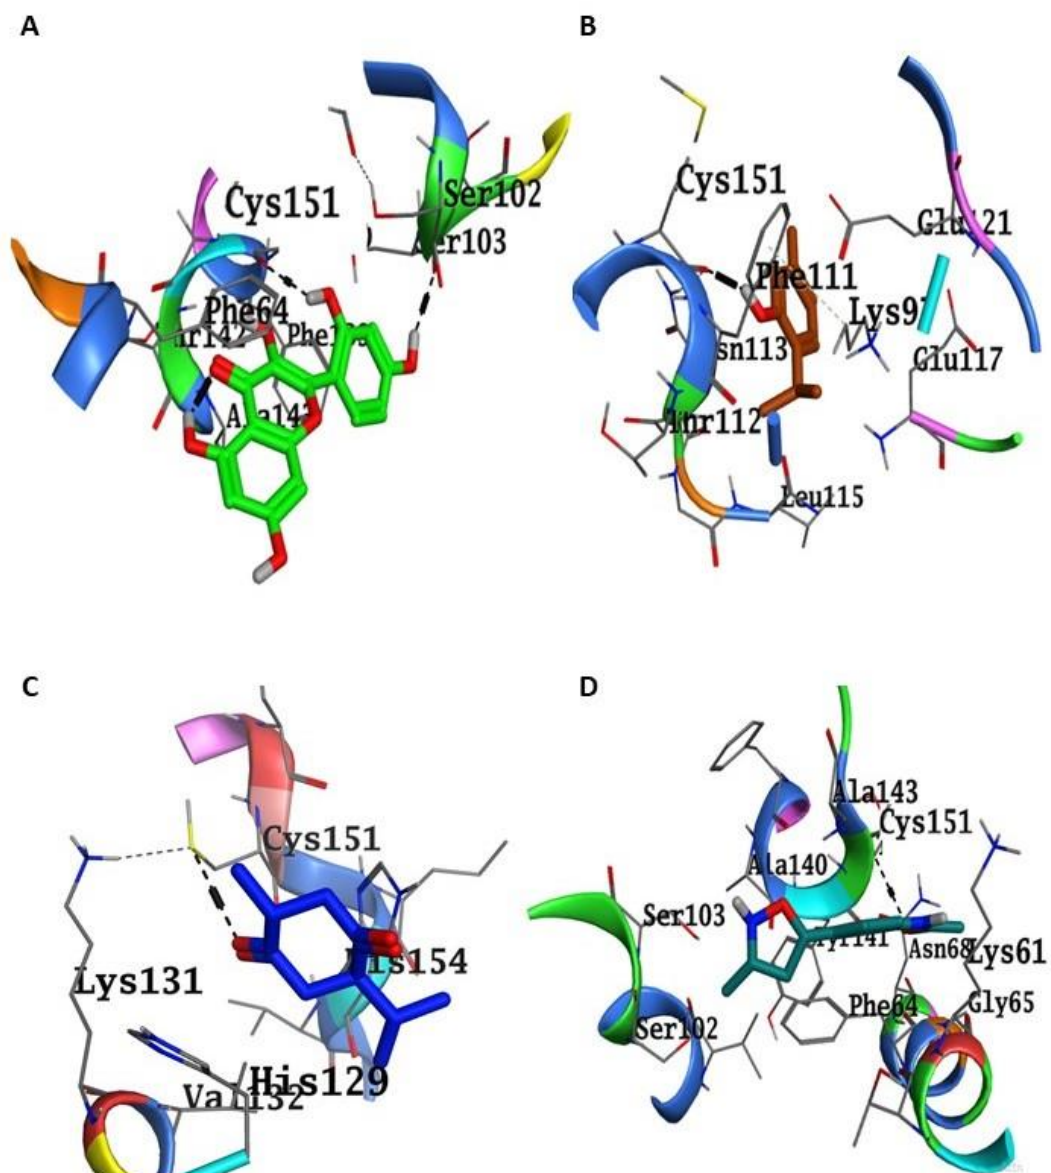

## 2) Tables

**Table. S1.** Receptor interaction of compounds A-C and galantamine into the galantamine binding site in the choline esterase PDB: 1DX6.

| Compound | S               | E_conf    | rmsd_refine | Receptor                                                                                                                                                                                                                                 |
|----------|-----------------|-----------|-------------|------------------------------------------------------------------------------------------------------------------------------------------------------------------------------------------------------------------------------------------|
|          | dG<br>Kcal/mole | Kcal/mole |             | Amino acid/Type of<br>bonding/Distance (Å) / Binding<br>Energy (Kcal/mole)                                                                                                                                                               |
| <b>1</b> | -6.4961         | -71.3709  | 1.7066      | TYR 70/ H-donor/3.03/-2.5<br>ASN 85/H-donor/3.32/-0.1<br>SER 200/H-acceptor/2.76/-3.2<br>PHE 331/H-acceptor/4.11/-0.1<br>HIS 440/Ionic/3.08/-4.0<br>ASP 72/pi-H/3.74/-0.2<br>GLY 118/pi-H /3.75/-0.4<br>GLY 118/pi-H/ 4.17/ -0.4         |
| <b>2</b> | -4.8590         | -21.0856  | 1.8786      | GLU 199/H-donor/3.31/-0.1<br>GLU 199/H-donor/3.73/-0.1<br>TRP 84/H-pi/3.78/-0.4<br>TRP 84/H-pi/ 4.67/-0.3<br>TRP 84/H-pi/4.11/-0.1<br>TRP 84/H-pi/4.67/-0.2<br>TRP 84/H-pi /4.81/-0.2<br>TRP 84/H-pi/4.21/-0.3<br>GLY 118/pi-H/4.77/-0.1 |
| <b>3</b> | -5.3373         | 1.4910    | 1.6847      | TYR 130/H-donor/3.64/-0.1<br>GLU 199/H-donor/3.56/-0.1<br>GLU 199/H-donor/3.55/-0.1<br>HIS 440/H-donor/3.68/-0.1<br>SER 200/H-acceptor/2.83/-2.0<br>TRP 84/H-pi/3.77/-0.1<br>TRP 84/H-pi/4.27/-0.2                                       |

|                    |         |         |        |                                                                                                                                  |
|--------------------|---------|---------|--------|----------------------------------------------------------------------------------------------------------------------------------|
|                    |         |         |        | TRP 84/H-pi/3.87/-0.3<br>GLY 118/pi-H/3.60/-0.8                                                                                  |
| <b>Galantamine</b> | -7.1875 | 21.0709 | 1.4719 | TRP 84/H-donor/3.39/-0.1<br>GLU 199/Ionic/3.91/-0.7<br>PHE 330/H-pi/4.75/-0.2<br>PHE 330/H-pi/4.62/-0.2<br>TRP 84/pi-H/3.86/-0.2 |

**Table. S2.** Receptor interaction of compounds 1-3 and the ligand 300 into the 300 binding site in the Cdk5 PDB: 3O0G.

| Compound | S               | E_conf    | rmsd_refine | Receptor                                                                                                                                                                                                                                                                                            |
|----------|-----------------|-----------|-------------|-----------------------------------------------------------------------------------------------------------------------------------------------------------------------------------------------------------------------------------------------------------------------------------------------------|
|          | dG<br>Kcal/mole | Kcal/mole |             | Amino acid/Type of<br>bonding/Distance (Å) /<br>Binding Energy (Kcal/mole)                                                                                                                                                                                                                          |
| <b>1</b> | -6.5722         | -77.1360  | 1.5296      | GLN 130/4.00/-0.1<br>GLU 81/H-donor/3.65/-0.2<br>LYS 33/H-acceptor/3.16/-0.2<br>VAL 18/H-acceptor/3.90/-0.1<br>LYS 33/H-acceptor/3.61/-1.0<br>LYS 33/Ionic/2.91/-5.1<br>VAL 18/pi-H/3.96/-0.1<br>VAL 18/pi-H/4.08/-0.5<br>VAL 18/pi-H/4.75/-0.2<br>ASN 144/pi-H/4.34/-0.1<br>ASN 144/pi-H/3.49/-0.3 |
| <b>2</b> | -5.4249         | -20.2428  | 0.8701      | ALA 31/H-donor/4.12/-0.1<br>GLY 11/H-donor/3.47/-0.1<br>GLY 11/H-donor/3.62/-0.1<br>PHE 80/H-pi/3.68/-0.5<br>VAL 18/pi-H/3.63/-0.5<br>VAL 18/pi-H/4.27/-0.1<br>ASN 144/pi-H/3.97/-0.1                                                                                                               |
| <b>3</b> | -5.3995         | 1.5897    | 1.6084      | ASN 131/H-donor/3.65/-0.1<br>VAL 18/H-acceptor/3.51/-0.1<br>LYS 33/H-acceptor/3.08/-1.5<br>PHE 80/H-pi/4.36/-0.3<br>PHE 80/H-pi/3.66/-0.5<br>VAL 18/pi-H/4.33/-0.5<br>ASN 144/pi-H/3.63/-0.7                                                                                                        |



|               |         |          |        |                                                                                                                                                                                                                                                                                                                                                                                                                                                                                                                    |
|---------------|---------|----------|--------|--------------------------------------------------------------------------------------------------------------------------------------------------------------------------------------------------------------------------------------------------------------------------------------------------------------------------------------------------------------------------------------------------------------------------------------------------------------------------------------------------------------------|
| <b>Ligand</b> | -7.7325 | -28.5348 | 1.8423 | CYS 83/H-donor/3.14/-2.0<br>CYS 83/H-donor/3.14/-2.0<br>GLU 81/H-donor/3.49/-0.4<br>GLU 81/H-donor/3.49/-0.4<br>VAL 18/H-acceptor/4.32/-0.2<br>VAL 18/H-acceptor/4.36/-0.2<br>CYS 83/H-acceptor/3.86/-0.3<br>CYS 83/H-acceptor/3.86/-0.3<br>LEU 133/H-acceptor/3.58/-0.2<br>LEU 133/H-acceptor/3.51/-0.2<br>ILE 10/pi-H/4.46/-0.4<br>VAL 18/pi-H/4.25/-0.7<br>GLN 85/pi-H/3.81/-1.0<br>ASN 144/pi-H/3.99/-0.2<br>ILE 10/pi-H/4.56/-0.5<br>VAL 18/pi-H/4.22/-0.7<br>GLN 85/pi-H/3.81/-1.0<br>ASN 144/pi-H/3.95/-0.3 |
|---------------|---------|----------|--------|--------------------------------------------------------------------------------------------------------------------------------------------------------------------------------------------------------------------------------------------------------------------------------------------------------------------------------------------------------------------------------------------------------------------------------------------------------------------------------------------------------------------|

**Table. S3.** Receptor interaction of compounds 1-3 and the ligand 66F into the 66F binding site in the BACE 1, PDB: 7D2V.

| Compound | S               | E_conf     | rmsd_refine | Receptor                                                                                                                                                                                                                                                                                                                                        |
|----------|-----------------|------------|-------------|-------------------------------------------------------------------------------------------------------------------------------------------------------------------------------------------------------------------------------------------------------------------------------------------------------------------------------------------------|
|          | dG<br>Kcal/mole | Kcal/mole  |             | Amino acid/Type of bonding/Distance (Å) / Binding Energy (Kcal/mole)                                                                                                                                                                                                                                                                            |
| <b>1</b> | -5.6644         | -74.9125   | 1.3282      | GLY 11/H-donor/3.13/-0.1<br>GLY 11/H-donor/3.13/-0.1<br>SER 229/H-donor/3.51/-0.4<br>SER 229/H-donor/3.51/-0.4<br>SER 229/H-donor/3.32/-0.4<br>SER 229/H-donor/3.32/-0.4<br>ARG 307/Ionic/3.80/-1.0<br>ARG 307/Ionic/3.80/-1.0<br>SER 10/pi-H/4.62/-0.3<br>ARG 307/pi-cation/3.21/-2.1<br>SER 10 /pi-H/4.62/-0.3<br>ARG 307/pi-cation/3.21/-2.1 |
| <b>2</b> | -5.39809465     | 1.68075621 | -15.7678709 | THR 232/H-donor/3.62/-0.1<br>THR 232/H-donor/3.62/-0.1<br>SER 10/pi-H/4.09/-0.1<br>ARG 307/ pi-H/ 4.97/-0.1<br>SER 10/pi-H/4.09/-0.1<br>ARG 307/pi-H/ 4.97/-0.1                                                                                                                                                                                 |
| <b>3</b> | -5.0369         | 3.0587     | 1.6280      | SER 10/H-donor/3.37/-0.1<br>SER 10/H-donor/3.37/-0.1<br>GLU 339/H-donor/4.03/-0.1<br>GLU 339/H-donor/4.03/-0.1<br>VAL 170/H-acceptor/3.54/-0.1<br>VAL 170/H-acceptor/3.63/-0.1                                                                                                                                                                  |

|                   |         |           |         |                                                                                                                                                                                                                                                                                                                                                                                                                                                                        |
|-------------------|---------|-----------|---------|------------------------------------------------------------------------------------------------------------------------------------------------------------------------------------------------------------------------------------------------------------------------------------------------------------------------------------------------------------------------------------------------------------------------------------------------------------------------|
|                   |         |           |         | VAL 170/H-acceptor/3.54/-0.1<br>VAL 170/H-acceptor/3.63/-0.1<br>ARG 307/H-acceptor/3.44/-0.2<br>ARG 307/H-acceptor/3.22/-0.2<br>ARG 307/H-acceptor/3.44/-0.2<br>ARG 307/H-acceptor/3.22/-0.2<br>SER 10/pi-H/3.99/-0.9<br>GLY 11/pi-H/3.44/-0.2<br>SER 10/pi-H/3.99/-0.9<br>GLY 11/pi-H/3.44/-0.2                                                                                                                                                                       |
| <b>Ligand 66F</b> | -8.0110 | -345.3253 | 1.57711 | ASP 228/H-donor/3.47/-0.2<br>ASP 228/H-donor/3.47/-0.2<br>ASP 32/H-donor/2.92/-7.5<br>ASP 228/H-donor/2.94/-9.1<br>ASP 32/H-donor/2.92/-7.5<br>ASP 228/H-donor/2.94/-9.1<br>ASP 32/H-donor/2.93/-2.9<br>ASP 32/H-donor/2.93/-2.9<br>GLY 230/H-donor/3.39/-0.2<br>GLY 230/H-donor/3.39/-0.2<br>GLY 230/H-donor/3.07/-3.0<br>GLY 230/H-donor/3.07/-3.0<br>SER 229/H-donor/3.37/-0.3<br>SER 229/H-donor/3.37/-0.3<br>GLY 11/H-donor/3.21/-0.1<br>GLY 11/H-donor/3.21/-0.1 |

|  |  |  |  |                              |
|--|--|--|--|------------------------------|
|  |  |  |  | LEU 30/H-acceptor/3.66/-0.1  |
|  |  |  |  | TRP 115/H-acceptor/3.59/-0.1 |
|  |  |  |  | LEU 30/H-acceptor/3.66/-0.1  |
|  |  |  |  | TRP 115/H-acceptor/3.59/-0.1 |
|  |  |  |  | PHE 108/H-acceptor/3.32/-0.1 |
|  |  |  |  | PHE 108/H-acceptor/3.32/-0.1 |
|  |  |  |  | ASP 228/Ionic/ 4.21/-0.2     |
|  |  |  |  | ASP 228/Ionic / 4.21/-0.2    |
|  |  |  |  | ASP 32/Ionic/2.92/-5.0       |
|  |  |  |  | ASP 32/ Ionic /3.64/-1.4     |
|  |  |  |  | ASP 228/Ionic/3.04/-4.2      |
|  |  |  |  | ASP 228/Ionic/2.94/-4.9      |
|  |  |  |  | ASP 32/Ionic/2.92/-5.0       |
|  |  |  |  | ASP 32 / Ionic/3.64/-1.4     |
|  |  |  |  | ASP 228/Ionic/ 3.04/-4.2     |
|  |  |  |  | ASP 228/Ionic/2.94/-4.9      |
|  |  |  |  | ASP 32 /Ionic/3.63/-1.4      |
|  |  |  |  | ASP 32/Ionic/2.93/-4.9       |
|  |  |  |  | ASP 32 / Ionic/3.63/-1.4     |
|  |  |  |  | ASP 32/ Ionic/2.93/-4.9      |
|  |  |  |  | TYR 71/H-pi/3.67/-0.5        |
|  |  |  |  | TYR 71/H-pi /3.67/ -0.5      |

**Table. S4.** Receptor interaction of compounds 1-3 and the ligand 65A into the 65A binding site in the glycogen synthase kinase 3 PDB: 5HLP.

| Compound | S               | E_conf    | rmsd_refine | Receptor                                                                                                                                                                                                                                                                           |
|----------|-----------------|-----------|-------------|------------------------------------------------------------------------------------------------------------------------------------------------------------------------------------------------------------------------------------------------------------------------------------|
|          | dG<br>Kcal/mole | Kcal/mole |             | Amino acid/Type of<br>bonding/Distance (Å) / Binding<br>Energy (Kcal/mole)                                                                                                                                                                                                         |
| <b>1</b> | -5.4860         | -78.8546  | 1.89496088  | VAL 135/H-donor/3.31/-0.1<br>LYS 85/H-acceptor/3.26/-0.1<br>LYS 85/H-acceptor/2.85/-12.7<br>VAL 70/H-acceptor/3.55/-0.1<br>LYS 85/Ionic/2.85/-5.6<br>TYR 134/H-pi/4.89/-0.2<br>LYS 85/pi-H/4.88/-0.1<br>LEU 188/pi-H/3.55/-0.2<br>CYS 199/pi-H/4.42/-0.1<br>ASP 200/pi-H/3.57/-0.1 |
| <b>2</b> | -5.1836         | -18.9100  | 1.4032954   | GLU 97/H-donor/3.16/-2.2<br>LYS 85/H-acceptor/3.05/-0.4<br>LEU 132/pi-H/3.87/-0.1<br>CYS 199/pi-H/4.31/-0.1<br>ASP 200/pi-H/3.72/-0.4                                                                                                                                              |
| <b>3</b> | -5.3032         | 2.7724    | 0.8087      | GLU 97/H-donor/3.24/-0.1<br>MET 101/H-donor/3.69/-0.1<br>CYS 199/H-donor/4.36/-0.1<br>VAL 110/H-acceptor/3.97/-0.1<br>LEU 188/H-acceptor/3.97/-0.1<br>LYS 85/H-acceptor/3.34/-0.1<br>LYS 85/H-acceptor/3.07/-7.6<br>ASP 200/H-acceptor/3.46/-0.2<br>LEU 132/pi-H/3.87/-0.1         |



|            |                 |  |        |                                                                                                                                                                                                                                                                                                           |
|------------|-----------------|--|--------|-----------------------------------------------------------------------------------------------------------------------------------------------------------------------------------------------------------------------------------------------------------------------------------------------------------|
|            |                 |  |        | CYS 199/pi-H/4.25/-0.1<br>ASP 200/pi-H/3.76/-0.2                                                                                                                                                                                                                                                          |
| <b>65A</b> | -<br>6.56960344 |  | 1.8019 | CYS 199/H-donor/4.32/-0.1<br>VAL 135/H-donor/3.54/-0.1<br>PRO 136/H-donor/3.35/-0.1<br>LEU 188/H-acceptor/3.82/-0.1<br>TYR 134/H-pi/4.97/-0.3<br>LEU 132/pi-H/4.21/-0.1<br>LEU 188/pi-H/4.29/-0.3<br>LEU 188/pi-H/4.53/-0.1<br>LEU 188/pi-H/4.06/-0.1<br>CYS 199/pi-H/3.94/-0.9<br>ASP 200/pi-H/4.27/-0.3 |
